1 Alteration of Soil Bacteriome by Prolonged Exposure to Metal Oxide Nanoparticles

2 Nzube Prisca Egboluche<sup>1</sup>, Hongtao Yu<sup>2</sup> and James Wachira<sup>1\*</sup>

3 <sup>1</sup>Department of Biology, School of Computer, Mathematical and Natural Sciences, Morgan State  
4 University, Baltimore, MD, USA

5 <sup>2</sup>Department of Chemistry, School of Computer, Mathematical and Natural Sciences, Morgan  
6 State University, Baltimore, MD, USA

7 \* Corresponding Author: James Wachira, [james.wachira@morgan.edu](mailto:james.wachira@morgan.edu)

8  
9

10

11

12

13

14

15

16

17

18

19

20

21

22

23

24

25

26

## 27 **Abstract**

28 Metal oxide nanoparticles (MONPs) have found applications in many industrial and consumer  
29 products and are inevitably released into the environment, including soil. Soils host diverse  
30 microorganisms that are integral to ecosystem function including regulating plant growth. In this  
31 study, the influence of Cu<sub>2</sub>O, Fe<sub>3</sub>O<sub>4</sub> and Ag<sub>2</sub>O NPs on soil microbial communities was assessed.  
32 Microbial community diversity and compositional structure was characterized using quantitative  
33 PCR and 16S rRNA gene sequencing. MONPs altered soil bacteria community composition by  
34 causing significant reduction in bacterial diversity and change in bacterial abundance. Soils with  
35 Cu<sub>2</sub>O and Ag<sub>2</sub>O NPs treatments significantly reduce bacterial diversity accompanied by shifts at  
36 the Class and Phylum taxonomic levels toward bacteria groups responsible for chitin degradation  
37 (*Bacteroidetes*) and nitrogen fixation (*alpha-Proteobacteria*). Response of bacterial communities  
38 to MONPs exposure is dependent on the exposure time and type of MONPs used. While the  
39 mechanisms underlying these observations remain to be elucidated, it is proposed that the known  
40 antimicrobial properties of Cu<sub>2</sub>O and Ag<sub>2</sub>O NPs cause reduced growth and viability of some  
41 bacteria taxa.

42 Keywords: Soil microbiome, metagenomics, Nanoparticles, Bacteria diversity, qPCR

43

## 44 **Importance**

45 Nanoparticles are finding many applications in society and as such there is the need to gain a better  
46 understanding of their potential effects on microorganisms in soil and other environmental niches.  
47 Soil contains a large diversity of microorganisms that play many essential roles in organic matter  
48 recycling and plant growth. Metagenomics has become an essential tool for understanding the  
49 functional diversity of microbiomes and in this study, it was used to assess the diversity of soil

50 bacteria communities in the presence of selected metal oxide nanoparticles. The reported changes  
51 in bacterial community structure suggest that nanoparticles have the potential to alter soil  
52 microbiomes. However, the effects depend on the composition of the nanoparticles suggesting that  
53 environmental impacts of different nanoparticle formulations are necessary.

54

## 55 **Introduction**

56 While nanomaterials arise in natural activities such as volcanic eruptions and the burning  
57 of fossil fuels, some are produced for use in diverse fields including food packaging and medical  
58 and industrial applications. The impetus to develop nanomaterials has arisen due to some unique  
59 characteristics that are not observed in similarly formulated bulk materials such as new optical,  
60 electrical, and chemical properties<sup>3</sup>. Whereas the scientific basis for these properties remain to  
61 fully understood, the size and the surface area of nanoparticles (NPs) are critical factors that  
62 influence the reactivity of NPs<sup>2,4</sup>. NPs are used in different applications because of their desired  
63 properties including optical<sup>5</sup>, mechanical<sup>6</sup>, magnetic and chemical<sup>1</sup>. NPs have been found useful  
64 in many fields of application including medical, pharmaceutical, electronic, food and cosmetics  
65 industries<sup>1,7-10</sup>. With increased production and use of different types of NPs, such as metal and  
66 metal-oxide NPs, it has resulted in continuous disposal of these NPs into the environment.  
67 Disposed NPs mostly end up in the soil and their accumulation could lead to exposure to living  
68 organisms<sup>11</sup>, thus raising concerns on the potential contamination of the environment and thus  
69 increased ecological risk.

70 Microbes are ubiquitous in the environment where they play diverse roles that reflect on  
71 both natural and perturbed functioning of ecological niches. Soil is a complex medium that hosts  
72 diversity of microorganisms, bacteria, fungi and archaea. The complexity, functioning, and

73 processes of the soil ecosystem is driven by soil microorganism and their extracellular enzyme  
74 activities<sup>12</sup>. The microbial diversity of soil microorganisms is one of the major indicator  
75 parameters of soil quality and productivity<sup>13</sup>. Soil microbiomes are influenced by environmental  
76 stressors resulting in changes in soil physical and chemical properties, thus altering the ecosystem  
77 functioning. The accumulation of heavy metals (Cd, Cu, Pb, & Zn) in soil led to overall microbial  
78 diversity decrease<sup>14</sup>. Given the substantial increase in the application of NPs in commercial  
79 products such as cosmetics, coatings, paints, food additives, drugs and electronics, release into the  
80 environment becomes inevitable.

81         The release of NPs into agricultural soils could be either deliberately as agrochemicals  
82 (e.g., nanopesticides)<sup>15</sup> or accidentally as contaminants<sup>16,17</sup>. The incorporation of NPs such as  
83 CeO<sub>2</sub>, Ag, ZnO, Cu<sub>2</sub>O in agrochemicals including fertilizers, pesticides<sup>10,15,18</sup> or growth  
84 regulators<sup>19</sup> have been reported. Many metal and metal oxide NPs, such as Ag, Cu<sub>2</sub>O, TiO<sub>2</sub> and  
85 ZnO NPs, have intrinsic antimicrobial properties, and therefore could be toxic to beneficial  
86 bacterial and fungi<sup>11,19,21</sup>. For example, soil bacterial communities decreased at day 15 and 60 in  
87 TiO<sub>2</sub> and ZnO NPs treated soils but had no effect at day zero<sup>22</sup> suggesting the impact of long-term  
88 exposure of NPs to microbial abundance. Others have reported significant reduction in bacterial  
89 and archaeal abundance with Ag NPs while Al<sub>2</sub>O<sub>3</sub> and SiO<sub>2</sub> NPs had no effect on microbial  
90 composition and community<sup>23</sup>. Alterations in microbial community structure and functioning by  
91 NPs have also been reported<sup>24,25,26</sup>. The *Actinobacteria* and *Acidobacteria* groups have been found  
92 to be susceptible to AgNPs application while *Bacteroidetes* and *Proteobacteria* were resistant<sup>23,27</sup>.  
93 In a planted and unplanted soils, AgNP at 100 mg/kg soil altered the structural composition of  
94 bacterial community and the soil metabolites<sup>28</sup>. In a study in which AgNP were added to soil in a  
95 mixture with sewage slurry, one species of plants (*Microstegium vimineum*) was adversely affected

96 as was the microbial biomass<sup>29</sup>. The soil microbial ecosystem also exhibited changes in species  
97 composition as measured with operational taxonomic units (OTUs). Interestingly, these authors  
98 reported that the NPs caused higher magnitudes of change than a AgNO<sub>3</sub> positive control.

99         Considering the broad application and continuous release of NPs in the environment, there  
100 is still sparse knowledge on the potential impact to soil microbial communities. While soil  
101 microbial communities are significant in maintaining ecosystem functioning such as plant growth,  
102 this study sought to investigate the response of soil microbial communities to the presence of  
103 different MONPs formulations. Thirty days incubation study was conducted using garden soil and  
104 Cu<sub>2</sub>O, Ag<sub>2</sub>O, and Fe<sub>3</sub>O<sub>4</sub> NPs at 500 mg/kg. The effect of MONPs on known soil bacterial phyla  
105 alpha- and beta-*Proteobacteria*, *Bacteroidetes*, *Actinomycetes*, and *Firmicutes*, was quantified  
106 using quantitative real-time PCR (qPCR) while the overall biodiversity was characterized using  
107 16S rRNA gene sequencing.

## 108 **Materials and Methods**

109         The copper oxide (Cu<sub>2</sub>O), silver oxide (Ag<sub>2</sub>O) and iron (II, III) oxide (Fe<sub>3</sub>O<sub>4</sub>) NPs in  
110 powder form were used in this study. The Cu<sub>2</sub>O and Fe<sub>3</sub>O<sub>4</sub> NPs were purchased from the U.S.  
111 Research Nanomaterials, Inc. The characterization of these NPs was adopted from the  
112 manufacturers. Cu<sub>2</sub>O NP has a diameter size of 10 nm, spherical shape, brown-black color, and  
113 99% purity, while Fe<sub>3</sub>O<sub>4</sub> NPs had a diameter size of 15-20 nm, dark brown color, spherical shape  
114 and 99.5% purity. Zeta potential is about 10.8 mv for pH 7. The Ag<sub>2</sub>O NPs in powder form was  
115 obtained from Sky Spring Nanomaterials Inc. Based on the manufacturer's characterization report,  
116 Ag<sub>2</sub>O NPs had a diameter of 20-30 nm, spherical shape, gray color and 99.9% purity.

117

## 118 **Soil Incubation and Microbial DNA Extraction**

119 Garden soil was thoroughly mixed with Cu<sub>2</sub>O, Ag<sub>2</sub>O, and Fe<sub>3</sub>O<sub>4</sub> NPs at 500 mg/kg  
120 respectively in 5 replicates for each treatment, then placed in a controlled environment between  
121 25°C – 30 °C to incubate. At day 1 of the incubation (24 hours after MONPs addition) and at day  
122 30, soil samples were collected from soil-NP treatments and control (0 mg/kg). Soil microbial  
123 DNA was extracted from the soil samples using DNeasy PowerMax soil isolation kit (MOBIO  
124 Laboratories, CA, USA), following the manufacturer’s instructions. The concentration of the  
125 extracted DNA was determined with Qubit 4 fluorometer that uses double-stranded DNA binding  
126 dye.

127

### 128 **Quantitative Real-Time Polymerase Chain Reaction (qPCR)**

129 Real-time qPCR was performed to quantify the known bacterial phyla, alpha- and beta-  
130 *Proteobacteria*, *Bacteroidetes*, *Actinomycetes*, and *Firmicutes* using bacteria phylum specific  
131 primers (Table 1)<sup>30</sup>. SYBR Green master mix fluorescent dye that is highly sensitive to DNA and  
132 phylum specific bacteria primers including the DNA template were used for the qPCR. The mock  
133 microbial DNA standard obtained from Zymo research was used for optimization while a no  
134 template control was used as a negative control. DNA samples at a volume of 1 µL, forward and  
135 reverse primers at 2.5 µL respectively, SYBR Green as master mix at 10 µL and nucleases free  
136 water at 4 µL were used to perform 20 µL PCR reaction at standard setting. The amplification  
137 condition was as follows: denaturation at 95 °C for 60 s, annealing temperature was based on the  
138 melting temperature of the specific primers for 60 °C and extension 60 °C for 60 s at 40 cycles.  
139 Finally, a melting curve analysis was performed from 60 °C to 95 °C with a ramp rate of 0.1<sup>0</sup>C.  
140 The qPCR data containing the melt curve and threshold cycles were exported. One-way ANOVA  
141 analysis with a Tukey’s HSD test to compare sample means was conducted. Probability level  $p <$

142 0.05 was considered statistically significant. The figures were created using the GraphPad Prism  
143 6 software (GraphPad Software Inc.).

144

145

## 146 **Illumina-Based 16S rRNA Gene Sequencing**

147 Soil microbial community diversity and composition was characterized using high  
148 throughput 16S rRNA sequencing on illumina MiSeq instrument. The concentrations, size and  
149 quality of the stored DNA isolates were determined using Qubit 4 fluorometer and tape station  
150 respectively. The V3 – V4 regions of the bacterial 16S rRNA gene were amplified with 1  $\mu$ M of  
151 16S primers 5'-TCGTCGGCAGCGTCAGATGTGTATAAGAGACAGCCTACGGGNGGCW-  
152 GCAG-3' forward, 5'-GTCTCGTGGGCTCGGAGATGTGTATAAGAGACAGGACTACHVG-  
153 GGTTCTAATCC-3' reverse and 2x KAPA HiFi HotStart master mix using a thermocycler PCR  
154 system (GeneAmp 9700, ABI) following the illumina 16S metagenomic sequencing library  
155 preparation protocol. The library product was purified, and final product size validated using a  
156 tape station. The libraries were quantified using Qubit 4 fluorometer, normalized and pooled in  
157 equimolar amounts. The amplicon sequence was done as a paired-end sequence (2 x 300) on a  
158 MiSeq instrument (Illumina, San Diego) according to the illumina standard protocol. Quality  
159 control of the data was also managed with FastQC<sup>31</sup>, followed by summarization with MultiQC<sup>32</sup>.  
160 Based on the quality metrics, the sequences were filtered and trimmed for further analysis. The  
161 sequences were demultiplexed and analyzed using Mothur (version 1.39.1) program following an  
162 established workflow developed by Schloss<sup>33</sup>. Using SILVA 16S rRNA database as a reference  
163 gene database, sequence reads were blasted for identification and classification. Related sequences

164 were clustered and the number of representatives of each cluster counted which is referred to as  
165 operational taxonomic units (OTUs) at 97% sequence similarity. The OTU ID were assigned to  
166 different taxonomic levels which produced a taxonomy table that was used for downstream  
167 analysis and visualization.

## 168 **Soil Microbial Community Diversity Measurement**

169 Using the taxonomy table, microbial diversity measurement was conducted. This involves  
170 estimating the alpha and beta diversity of the microbial communities based on the weighted  
171 UniFrac pairwise distance matrix of all samples at two-time points day 1 and 30. The alpha  
172 diversity was estimated using the Chao1 et al<sup>34</sup> and Simpson index<sup>35</sup>. To derive the dissimilarity  
173 of microbial communities (beta diversity) from different sample treatments the non-metric multi-  
174 dimensional scaling (NMDS) and principal coordinate analysis (PCoA) metric multi-dimensional  
175 scaling analyses were conducted. The Bray-Curtis Emperor plot was also generated with QIIME2  
176 plugins including the DADA2 denoising pipeline<sup>36,37</sup>. The statistical significance of the microbial  
177 diversity was compared using analysis of molecular variance (AMOVA) and homogeneity of  
178 molecular variance (HOMOVA) statistical analyses. Both AMOVA and HOMOVA analyses were  
179 done in Mothur. The visualization of different phylum and class of bacteria composition and  
180 phylogenetic tree construction were done in R using phyloseq workflow developed by McMurdie  
181 and Holmes<sup>38</sup> and web-based galaxy software.

## 182 **Results**

### 183 **Effects of MONPs on Soil Bacteria Phyla**

184 Real time quantitative PCR (qPCR) and high throughput 16S rRNA gene sequencing were  
185 used to assess the impact of MONPs on soil microbial communities. Five bacteria phyla (Table 1)



186 commonly found in agricultural soil were quantified with qPCR. After 30 days of incubation, the  
187 qPCR result showed that *Proteobacteria* was dominant in all the soil samples irrespective of the  
188 MONPs treatment. On day 1, there was no significant difference in the bacterial abundance  
189 between MONPs and control treatments (Fig. 1a) while on day 30, Cu<sub>2</sub>ONP treatment significantly  
190 altered the abundance of the target bacteria groups particularly the *Actinomycetes* and  
191 *Bacteroidetes* when compared to control ( $p < 0.02$ ) and Fe<sub>3</sub>O<sub>4</sub>NP treatments ( $p < 0.003$ ) (Fig. 1b).  
192 Among the MONPs treatments, Fe<sub>3</sub>O<sub>4</sub>NPs had lower C<sub>t</sub> value compared to other MONPs treatment  
193 types, indicating that the addition of Fe<sub>3</sub>O<sub>4</sub>NPs increased the overall abundance of the target  
194 bacteria groups. The addition of Ag<sub>2</sub>ONPs and Cu<sub>2</sub>ONPs increased the abundance of *Bacteroidetes*  
195 when compared to control (Fig. 1c). Overall, soil bacterial groups responded differently to the  
196 different MONPs treatments.

197 Table 1. The list of bacteria phylum specific primers that targets some common bacteria groups  
198 found in agricultural soils.

| Target bacteria group | Primer name   | Sequence 5' – 3'       |
|-----------------------|---------------|------------------------|
| Alphaproteobacteria   | Aprot -0528-F | CGGTAATACGRAGGGRGYT    |
|                       | Aprot -0689-R | CBAATATCTACGAATTYCACCT |
| Betaproteobacteria    | bProt-0972-F  | CGAARAACCTTACCYACC     |
|                       | bProt-1221-R  | GTATGACGTGTGWAGCC      |
| Firmicutes            | Firm-0525-F   | CCGCGGTAATACGTAGGT     |
|                       | Firm-1040-R   | ACCATGCACCACCTGTC      |
| Actinobacteria        | Acti-1154-F   | GRDACYGCCGGGGTYAACT    |
|                       | Acti-1339-R   | TCWGCGATTACTAGCGAC     |

Bacterioidetes

Bdet-0107-F

GCACGGGTGMGTAACRCGTACCCT

Bdet-0309-R

GTRTCTCAGTDCCARTGTGGG

199

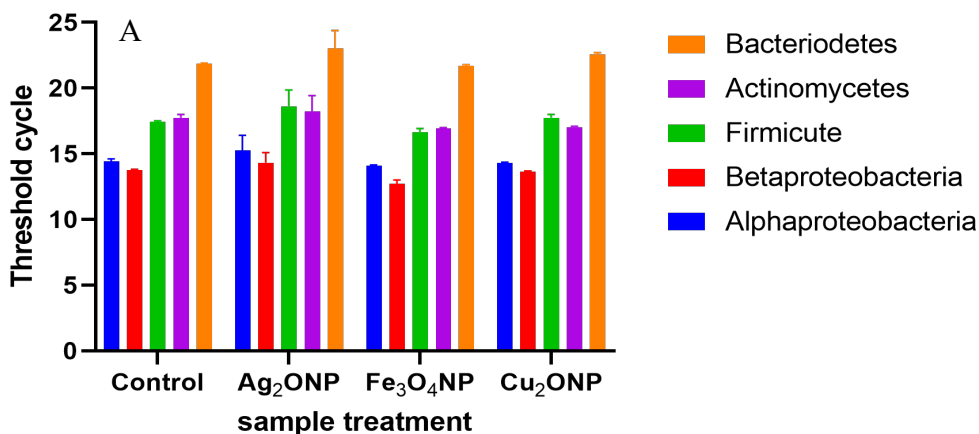

200

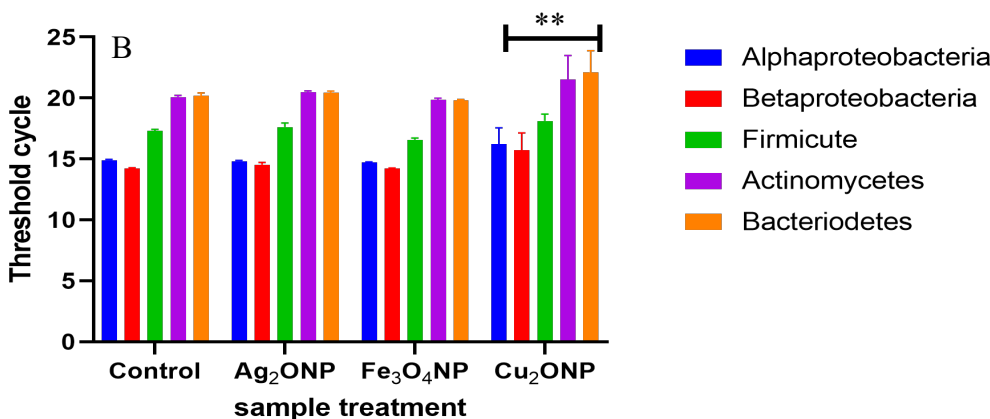

201

202

203

204

205

206

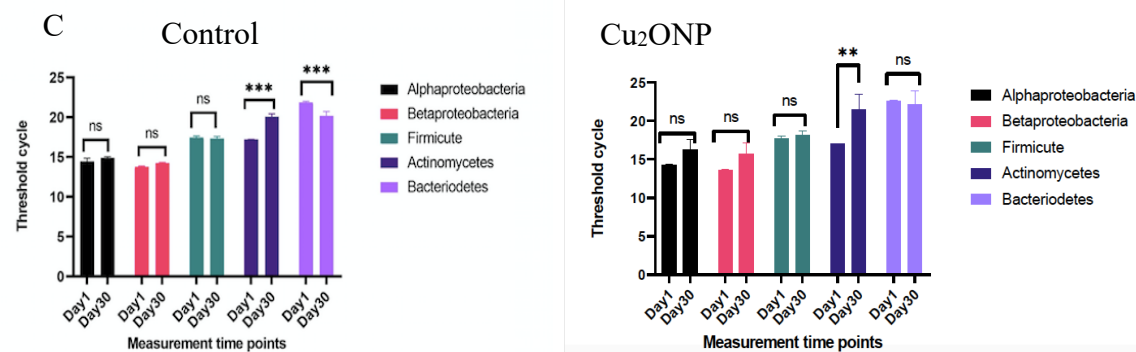

207

208

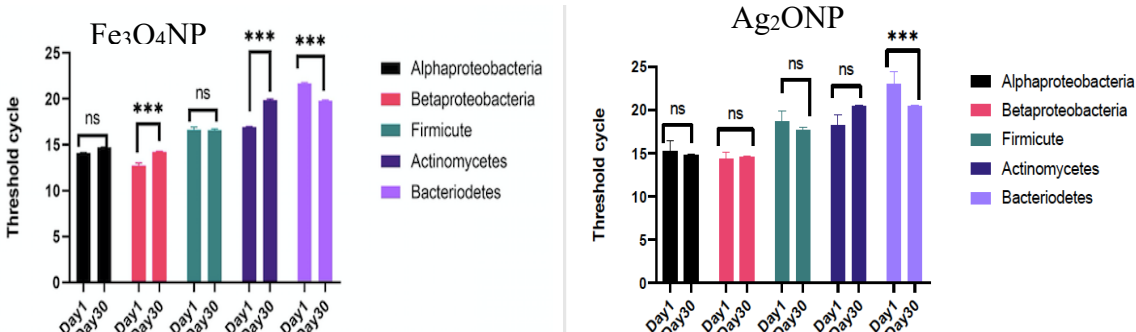

209

210

211 Figure 1. The abundance of target bacteria phyla in the soil exposed to Cu<sub>2</sub>O, Fe<sub>3</sub>O<sub>4</sub>, and Ag<sub>2</sub>O  
 212 NPs at 500 mg/kg and control (0 mg/kg) measured by their threshold cycle on the y-axis and  
 213 sample treatments on the x-axis at (A) day 1 & (B) day 30. C) Relative abundance of target bacteria  
 214 in the soil measured by their threshold cycle on the y-axis and time period on the x-axis in different  
 215 soil treatments. Each bar represents the mean (n=5) and the standard error within each sample  
 216 treatment. The lower the threshold value the higher the proportion of the bacteria group.

217

218 Table 2. The ANOVA p- values of the target bacteria and the time of measurement - day 1 & 30  
 219 under each treatment.

| Source of variation                     | Control                  | Ag <sub>2</sub> ONP      | Fe <sub>3</sub> O <sub>4</sub> NP | Cu <sub>2</sub> ONP      |
|-----------------------------------------|--------------------------|--------------------------|-----------------------------------|--------------------------|
| Time period                             | <0.0001 <sup>(***)</sup> | 0.5609 <sup>ns</sup>     | <0.0001 <sup>(***)</sup>          | 0.0164 <sup>(*)</sup>    |
| Target bacteria                         | <0.0001 <sup>(***)</sup> | <0.0001 <sup>(***)</sup> | <0.0001 <sup>(***)</sup>          | <0.0001 <sup>(***)</sup> |
| Interaction<br>(time x target bacteria) | <0.0001 <sup>(***)</sup> | 0.0832 <sup>ns</sup>     | <0.0001 <sup>(***)</sup>          | 0.1895 <sup>ns</sup>     |

220 ANOVA significant at p<0.05, (ns) means not significant.

221

## 222 Metagenomics Analysis of Microbial Composition

223 The 16S rRNA sequencing result showed that a total of 15,170,036 high-quality sequence  
 224 reads were obtained from all the treatments. The sequence reads ranged from 1,323,255 –

225 2,696,830 among the treatment groups. The bacteriome was dominated by *Proteobacteria*,  
226 *Bacteriodetes*, *Acidobacteria*, *Chloroflexi*, *Actinobacteria*, *Planctomycetes*, *Chlorobi*,  
227 *Verrucomicrobia*, *Firmicutes* and other unclassified bacteria group at varying relative abundance  
228 at different time points (Table 3). *Proteobacteria*, *Bacteriodetes*, and unclassified bacteria groups  
229 made up of 76% of the total bacteria population (Table 3; Fig. 2). Similar to the qPCR result with  
230 the 16S analysis, *Proteobacteria* was found to dominate the soil samples consisting approximately  
231 40% of total bacteria phyla. The class of *Proteobacteria* comprised of *alpha-Proteobacteria*,  
232 *gamma-Proteobacteria* and least abundance of *beta-Proteobacteria* (Fig. 3). Phylum  
233 *Parcubacteria* (OD1) was only present in control treatment indicating decreased abundance by  
234 MONP addition. There was no change in the abundance of *Firmicutes* at different time points  
235 (Table 3).

236 Sequence reads ranged from 1,763,083 to 2,696,830 on day 1 and day 30 respectively in  
237 untreated soil samples while in MONPs treated soils, the number of reads decreased ranging from  
238 1,323,255 to 1,943,646. On day 1, the total number of OTUs richness was 50,395 and 41,995 on  
239 day 30 (Fig. 4 a & b). Compared to control treatments, bacterial OTUs significantly decreased  
240 with the addition of MONPs (Fig. 4, Table 4). The population of *Bacteriodetes* had a 2 - 4%  
241 increase after 30 days of incubation in all the MONP treatments but remained unchanged in the  
242 control. While the relative abundance of *Chlorobi* and *Parcubacteria* (OD1) phyla were negatively  
243 affected by MONPs, there was no change in the abundance of *Firmicutes* across all the treatments  
244 at different time points (Table 3). Different classes of bacteria were also affected by the MONPs  
245 like the *Acidobacteria-Gp10*, *Chloroflexi-unclassified*, *OD1\_class\_incertae\_sedis* and  
246 *Flavobacteria* (Fig.3).

247

248

249 Table 3. Top 10 bacteria phyla present in the soil and their percentage abundance at day 1 and day

250 30.

| Bacteria Phyla        | Day 1 | Day 30 |
|-----------------------|-------|--------|
| Proteobacteria        | 39.5% | 37.8%  |
| Bacteria-unclassified | 24.8% | 24.9%  |
| Bacteroidetes         | 11.3% | 13.9%  |
| Acidobacteria         | 6.7%  | 6.9%   |
| Chloroflexi           | 3.8%  | 3.1%   |
| Actinobacteria        | 3.6%  | 3.4%   |
| Planctomycetes        | 2.2%  | 1.7%   |
| Chlorobi              | 2.1%  | 1.4%   |
| Verrucomicrobia       | 1.5%  | 1.8%   |
| Firmicutes            | 0.9%  | 1.0%   |

251

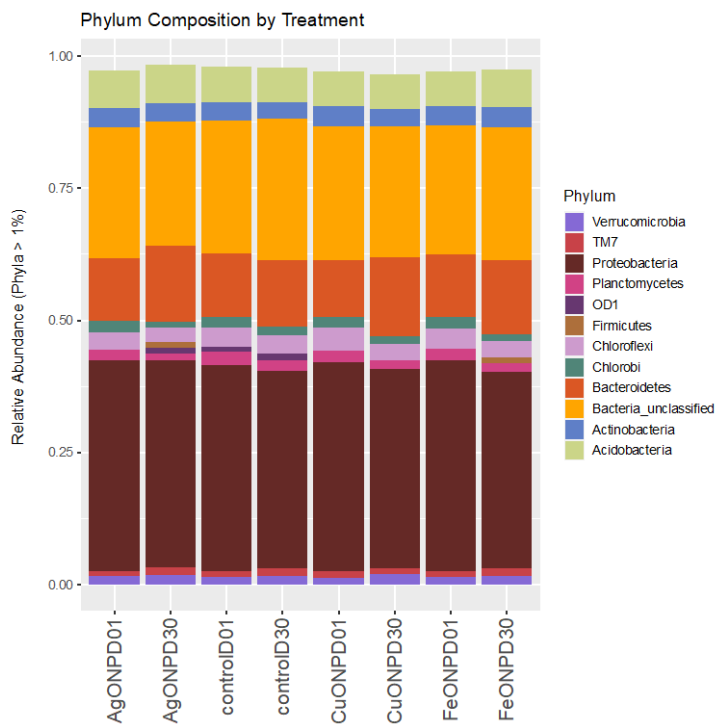

252

253 Figure 2. Relative abundance of different bacteria phylum in soil treated with Cu<sub>2</sub>O, Fe<sub>3</sub>O<sub>4</sub>, and

254 Ag<sub>2</sub>O NPs and control (untreated soil) at day 1 and day 30.

255

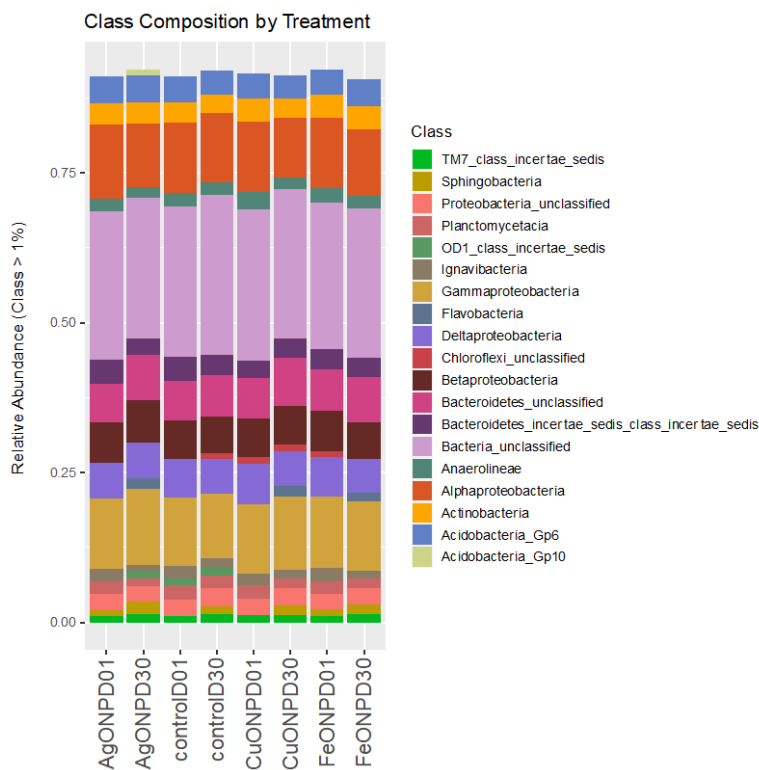

256

257 Figure 3. Relative abundance of different classes of bacteria in soil treated with Cu<sub>2</sub>O, Fe<sub>3</sub>O<sub>4</sub>, and

258 Ag<sub>2</sub>O NPs and control (untreated soil) at day 1 and day 30.

259

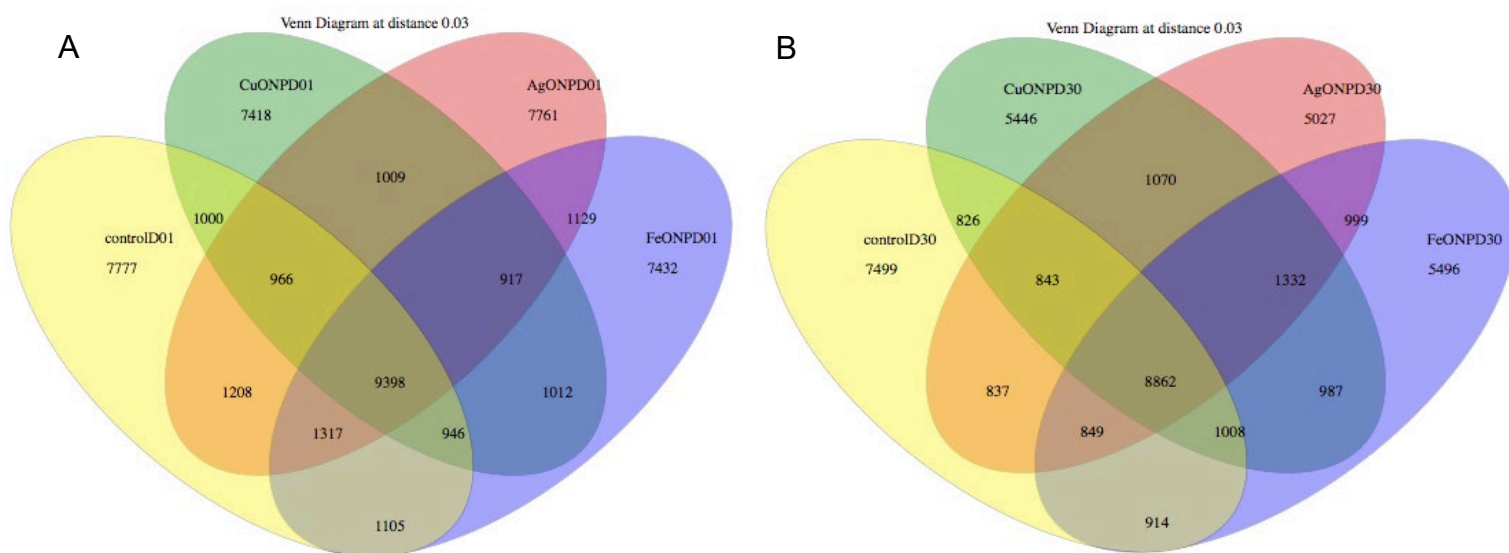

268 Figure 4. Venn diagram showing the amount of individual and shared OTUs within, between and  
269 among 4 sample treatments Cu<sub>2</sub>O, Fe<sub>3</sub>O<sub>4</sub>, and Ag<sub>2</sub>O NPs and control (untreated) on a) day 1 and  
270 b) day 30. The number of OTU richness decreased on day 30 for the MONPs treatments.

271

## 272 **Soil Bacteria Community Diversity Change with MONPs Exposure**

273 The alpha diversity of bacteria community within the sample treatments was measured  
274 using the Chao1 and Simpson index metrics (Fig. 5). The Chao1 diversity index showed that in  
275 the control treatment, the bacteria communities were intact and stable after 30 days there was no  
276 significant reduction in bacteria richness. For the MONPs treated soils, the Chao1 diversity index  
277 value decreased over time with Ag<sub>2</sub>ONP having the lowest Chao1 index value on day 30 and  
278 Cu<sub>2</sub>ONP on day 1 (Fig. 5). The principal coordinate analysis (PCoA, Fig. 6a) and non-metric multi-  
279 dimensional scaling (NMDS, Fig. 6b) showed the difference in microbial diversity between sample  
280 treatments at day 1 and day 30 ( $p < 0.031$ , AMOVA analysis). On day 1, the MONP treatments  
281 and control samples were clustered together as shown in Fig. 6a. On day 30, the MONPs treatments  
282 were significantly distant from the control indicating a significant change in the bacteria  
283 community diversity with the addition of Cu<sub>2</sub>O, Fe<sub>3</sub>O<sub>4</sub>, and Ag<sub>2</sub>O NPs ( $p < 0.0001$ , HOMOVA  
284 analysis) (Table 4). The hierarchical clustering of the treatments also showed that on day 30,  
285 control sample was distant apart from the MONPs treatments (Fig. 6c). Of note is that the Bray-  
286 Curtis dissimilarity index clusters the samples based on time indicating that the microbial  
287 composition changed as a function of time irrespective of treatment (Fig. 6d). This observation is  
288 reflected in diversity distance measurement using weighted UniFrac (Fig. 5), which demonstrates  
289 the community differences between the two time-points for most of the variation in the data (Fig.  
290 6).



291 Table 4. Analysis of molecular variance (AMOVA) and Homogeneity of molecular variance  
 292 (HOMOVA) of microbial communities.

| Analysis | Comparison                                                                        | P-value             |
|----------|-----------------------------------------------------------------------------------|---------------------|
| AMOVA    | Day 1 – Day 30                                                                    | 0.031*              |
|          | Ag <sub>2</sub> ONP-Cu <sub>2</sub> ONP-Fe <sub>3</sub> O <sub>4</sub> NP-Control | 0.796 <sup>ns</sup> |
| HOMOVA   | Day 1 – Day 30                                                                    | 0.035*              |
|          | Ag <sub>2</sub> ONP-Cu <sub>2</sub> ONP-Fe <sub>3</sub> O <sub>4</sub> NP-Control | <0.001*             |

293

294

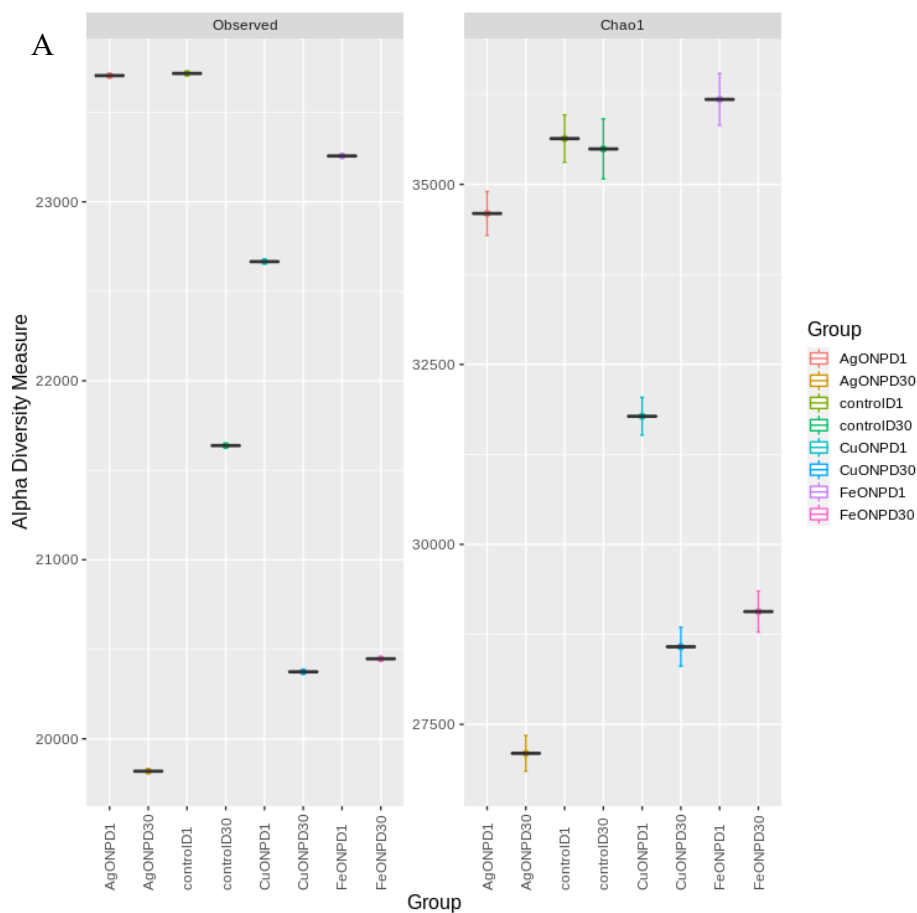

295

296

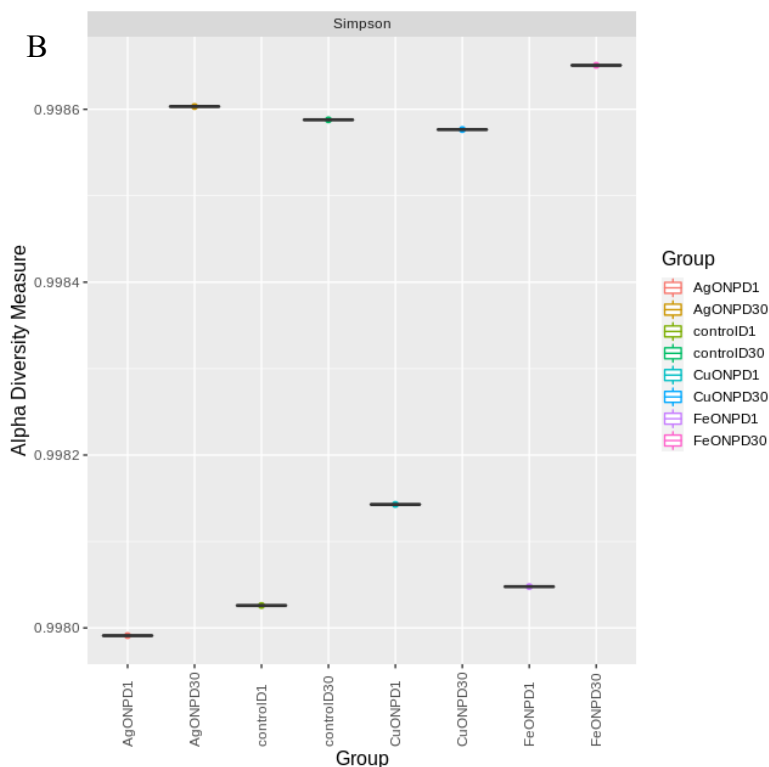

297

298 Figure 5. Alpha diversity measurement by a) Observed and Chao1 indices and b) Simpson index  
299 to estimate the bacteria community richness and evenness respectively after 30 days of soil  
300 exposure to Cu<sub>2</sub>O, Fe<sub>3</sub>O<sub>4</sub>, and Ag<sub>2</sub>O NPs. Bacteria community richness were measured on day 1  
301 and day 30 within each sample treatment.

302

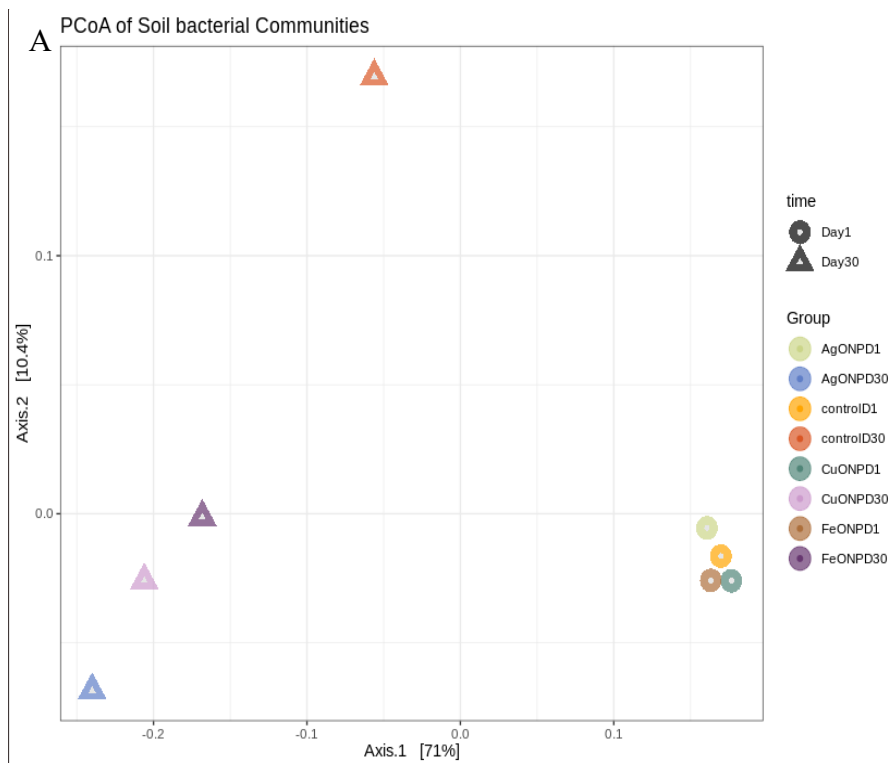

303

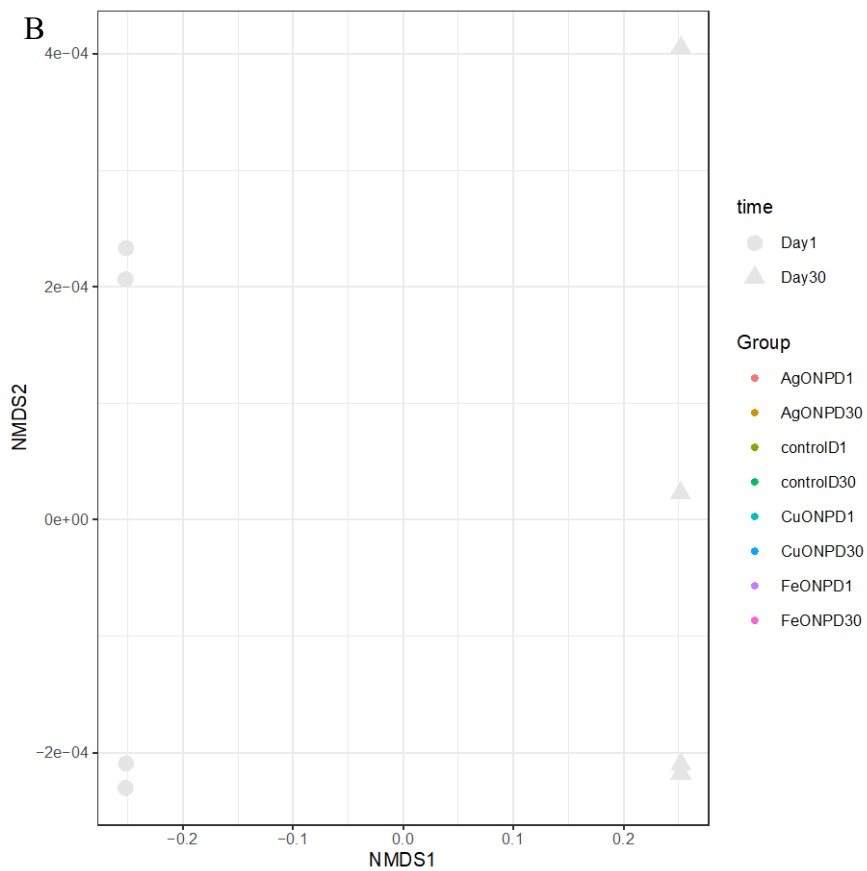

304

305

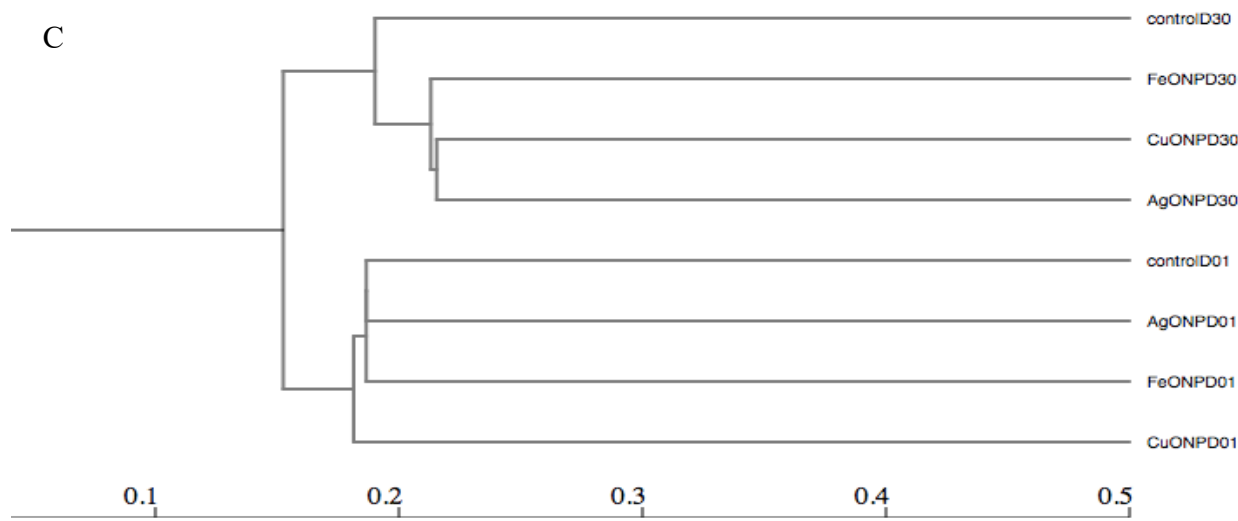

306

307

308

309

310

311

312

313

314

315

316

317

318

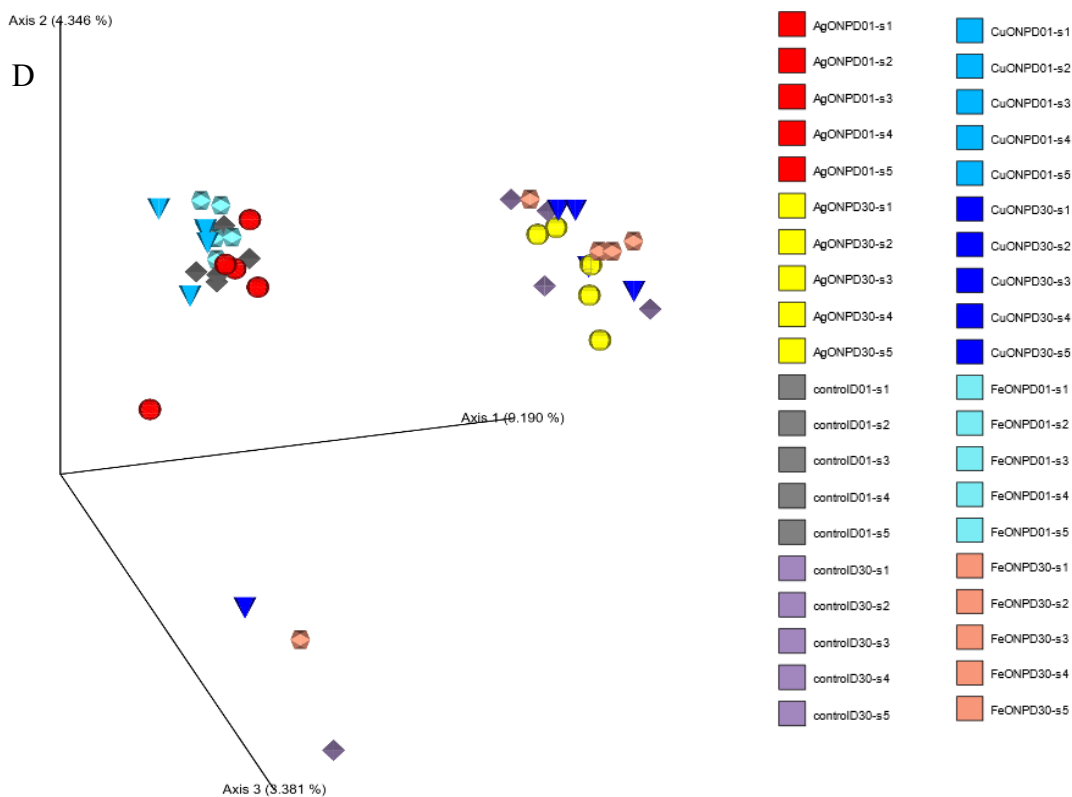

319 Figure 6. Principal coordinate analysis (PCoA) of soil bacteria calculated based on Bray-Curtis

320 dissimilarity index (square-rooted to make metric) (a), Non-metric multi-dimensional scaling

321 (NMDS) (b), showing bacteria diversity. Shapes represent different points of measurement while  
322 the colors represent the sample treatments. Hierarchical clustering dendrogram (c) of weighted  
323 UniFrac distance of bacterial communities showing the relationship between sample treatments  
324 treated with Cu<sub>2</sub>O, Fe<sub>3</sub>O<sub>4</sub>, and Ag<sub>2</sub>O NPs at 500 mg/kg soil on day 1 and day 30. (d) Bray-Curtis  
325 Emperor plot showing the clustering of samples along the first, second and third axes.

326

## 327 **Discussion**

328 Soil bacteria are intricate part of soil processes such as nutrient recycling, decomposition  
329 of organic matter and improvement of plant growth<sup>39</sup>, therefore it is a major driver of ecosystem  
330 functioning. MONPs serve vital roles in industrial and consumer products and are known to have  
331 antimicrobial properties<sup>10,11,40</sup>. Given that some MONPs have the tendency to influence microbial  
332 activities and composition, this could pose potential risk to agroecosystems. With the sensitive  
333 nature of microbial diversity and structure to environmental stressors such as the presence of heavy  
334 metals and nutrient deficiency<sup>14,41</sup>, these factors become major assessment indicators of microbial  
335 response to environmental contaminant such as MONPs. This study provides results on the  
336 differential alteration of soil bacteria communities with MONPs. Using Cu<sub>2</sub>O, Fe<sub>3</sub>O<sub>4</sub>, and Ag<sub>2</sub>O  
337 NPs the impact of MONPs on soil microbial communities was evaluated.

338 The *Proteobacteria* phylum comprising of *alpha-* and *gamma-* *Proteobacteria* dominated  
339 the soil samples. The *alpha-Proteobacteria* were dominated by *Rhodospirillaceae*,  
340 *Sphingomonadales*, *Rhizobiales*, bacteria orders while *gamma-Proteobacteria* were dominated by  
341 the *Xanthomonadaceae* and unclassified *gamma-Proteobacteria*. These bacteria groups known to  
342 be involved in nitrogen fixation<sup>42</sup>. These results are in consistent with other studies that observed  
343 dominance of *Proteobacteria* in agricultural soils<sup>43,44</sup>. Upon treatment with MONPs, there was no

344 change in the abundance of *Proteobacteria* while *Bacterioidetes* generally increased after 30 days  
345 of exposure. The resistance of *Proteobacteria* to MONPs inhibitory effect could be that some  
346 classes of *Proteobacteria* are resistant to metal ions released from MONPs. For example,  
347 *Sphingomonadales* have been shown to have high tolerance to metal stress<sup>45,46</sup>. Ge et al<sup>47</sup> reported  
348 a positive impact of TiO<sub>2</sub> and ZnO NPs on *Sphingomonadaceae*, *Streptomycetaceae* and  
349 *Streptomyces* in dose-dependent manner. The stimulating effect of MONPs on some members of  
350 *Proteobacteria* such as *Sphingomonadales* could have overshadowed the reduction of few bacteria  
351 taxa thereby showing no change in abundance after 30 days of MONPs exposure. Because *alpha-*  
352 *Proteobacteria* are made up of soil nitrogen fixing bacteria and organic material decomposers, it  
353 is likely that the regulatory pathway for nitrogen fixation and carbon cycling were unaffected.  
354 *Bacterioidetes* generally increased after 30 days of soil incubation showing resilience in the  
355 presence of MONPs (Table 3). The increased abundance after 30 days could be a result of lack of  
356 penetration of MONPs into the bacteria cell. Similar stimulatory effect on *Bacterioidetes* have been  
357 reported which was attributed to the presence of metal ion resistance genes<sup>27,48,49</sup>. Studies have  
358 shown that the inhibitory effect of MONPs to gram-negative bacteria such as *E. coli* could be  
359 attributed to the structural make-up of the bacteria cell wall<sup>50</sup>. *Bacterioidetes* are reported to be a  
360 very important bacteria group responsible for degradation of organic materials such as chitin<sup>49</sup>,  
361 therefore their enrichment in the presence of MONPs supports the catabolic pathways and nutrient  
362 cycling.

363 Different classes of bacteria were stimulated by MONPs application for example the  
364 *Acidobacteria-Gp10*, *Chloroflexi-unclassified*, *OD1\_class\_incertae\_sedis* and *Flavobacteria*  
365 (Fig. 3). These results suggest that MONPs addition not only affect bacterial communities at lower  
366 levels of order, families, and genera as reported by Meli et al<sup>51</sup>, but also at the class and phylum

367 level as shown in this study. Collins et al<sup>52</sup> reported that control samples were dominated by  
368 members of *Rhizobiales*, *Flavobacteria* and *Sphingomonadales* but these bacteria groups  
369 decreased with the addition of copper and zinc oxide NPs and in soil depth over the time period.  
370 In contrast to our study, *Flavobacteria* was not detected in the control sample and on day 1 but  
371 only in MONPs treated samples at day 30. This shows variation in the differential composition of  
372 microbial communities that exist in agricultural soils, which could be dependent on the abiotic  
373 factors and agricultural practices such as fertilization, CO<sub>2</sub> concentration, salinization and soil  
374 properties that shape the soil microbiome<sup>53,54</sup>.

375 In addition, the diversity measurement revealed increase in the bacterial community  
376 richness at day 1 with the addition of Fe<sub>3</sub>O<sub>4</sub> NPs (Fig. 5a) compared to control. The presence of  
377 Fe<sub>3</sub>O<sub>4</sub> NPs in the soil stimulates the growth of some bacterial groups such as *beta-Proteobacteria*  
378 as shown using qPCR method (Fig. 1c). Iron oxide NPs have surface sites that binds to soil organic  
379 compounds such as humic and fluvic acids that are intricate part of the soil microbiome, therefore  
380 could promote the bioavailability of iron to soil bacteria thus stimulating the growth of soil  
381 microbes<sup>55</sup>. After 30 days of MONPs exposure, alpha diversity measured by Chao1 index revealed  
382 that the bacteria richness reduced with the addition of MONPs and was greater with Ag<sub>2</sub>O and  
383 Cu<sub>2</sub>O NPs (Fig. 5). The length of MONPs contributed to the degree of MONPs impact on bacteria  
384 community diversity and composition (Table 4). Given that the Ag<sub>2</sub>O and Cu<sub>2</sub>O NPs used in this  
385 study are known to have antimicrobial properties<sup>11,40</sup>, we proposed that the reduction effects on  
386 the bacterial diversity was a result of the release of metal ions from MONPs thereby causing  
387 bacterial toxicity.

388 In consistent with our results, other studies have reported a shift in the relative abundance  
389 of different bacteria phyla after 30 days of Ag, CuO and ZnO NPs exposure compared to 2 h of

390 NP exposure<sup>41</sup>. Accordingly, You et al<sup>56</sup> monitored a similar significant decrease in bacteria  
391 richness after 30 days of 0.5, 1 and 1 mg/g soil ZnO NPs exposure. Another study observed a  
392 greater decrease on soil bacterial communities at day 60 than day 15 in TiO<sub>2</sub> and ZnO NPs treated  
393 soils but had no effect at day zero<sup>22</sup>. The PCoA and NMDS at the OTU level (97% similarity)  
394 showed distinct difference in bacterial community composition at day 1 and day 30 confirmed by  
395 AMOVA analysis ( $p < 0.001$ ). Close bacterial clustering was observed on day 1 of MONPs  
396 exposure indicating that the bacterial communities were stable (Fig. 6). After 30 days of exposure,  
397 MONP treated soil samples were significantly distant from control sample indicating a significant  
398 change in the bacterial community. Overall, the application of MONPs caused a substantial shift  
399 in bacteria community composition and structure which was driven by the duration of MONPs  
400 exposure and the type of MONPs.

401 In conclusion, changes in the relative abundance of known bacterial taxa and overall  
402 bacterial diversity with Cu<sub>2</sub>O, Fe<sub>3</sub>O<sub>4</sub> and Ag<sub>2</sub>O NPs at 500 mg/kg soil over a 30-day period of  
403 exposure was investigated using 16S rRNA sequencing and qPCR techniques. Our results showed  
404 that the addition of MONPs altered bacterial community composition by causing significant  
405 reduction in bacterial diversity and change in bacterial abundance. After 30 days of MONPs  
406 exposure, the bacterial diversity was significantly reduced with Cu<sub>2</sub>O and Ag<sub>2</sub>O NPs having  
407 greater impact. The *alpha-Proteobacteria* and *Bacteroidetes* were not negatively  
408 impacted in the presence of MONPs over the 30-day period of exposure thus, supports the nitrogen  
409 fixation and chitin degradation pathway. The long exposure of microbial communities to MONPs  
410 contributed to the degree of bacteria diversity reduction effects observed in this study. The  
411 variation in susceptibility and sensitivity of some bacteria groups to MONPs stimulated a shift in  
412 microbial community structure towards a more MONPs tolerant bacteriome (e.g *Bacteroidetes*).



413 Since soil serve as a sink to NPs deposition, more long-term studies of NPs exposure to soil  
414 microbiome is required to determine the concentration threshold that could substantially influence  
415 key bacteriome and the functioning of agroecosystems.

416

## 417 References

418 1. Khan I, Saeed K, Khan I. 2017. Nanoparticles: Properties, applications and toxicities.  
419 *Arabian Journal of Chemistry*. <https://doi.org/10.1016/j.arabjc.2017.05.011>

420

421 2. Powers KW, Palazuelos M, Moudgil BM, Roberts SM. 2007. Characterization of the  
422 size, shape, and state of dispersion of nanoparticles for toxicological studies.  
423 *Nanotoxicology*, 1(1), 42–51. <https://doi.org/10.1080/17435390701314902>

424

425 3. Maynard AD, Warheit DB, Philbert MA. 2011. The new toxicology of sophisticated  
426 materials: Nanotoxicology and beyond. *Toxicological Sciences*, 120(SUPPL.1).  
427 <https://doi.org/10.1093/toxsci/kfq372>

428

429 4. Gattoo MA, Naseem S, Arfat MY, Mahmood Dar A, Qasim K, Zubair S. 2014.  
430 Physicochemical properties of nanomaterials: Implication in associated toxic  
431 manifestations. *BioMed Research International*, 2014.  
432 <https://doi.org/10.1155/2014/498420>

433

434 5. Wiechers JW, Musee N. 2010. Engineered inorganic nanoparticles and cosmetics: facts,  
435 issues, knowledge gaps and challenges. *Journal of biomedical nanotechnology*, 6 5, 408-  
436 31 .

437

438 6. Guo D, Xie G, Luo J. 2014. Mechanical properties of nanoparticles: Basics and  
439 applications. *Journal of Physics D: Applied Physics*, 47(1). <https://doi.org/10.1088/0022-3727/47/1/013001>

441

- 442 7. Shang Y, Kamrul Hasan M, Ahammed GJ, Li M, Yin H, Zhou J. 2019. Applications of  
443 nanotechnology in plant growth and crop protection: A review. *Molecules*, 24(14).  
444 <https://doi.org/10.3390/molecules24142558>
- 445
- 446 8. Ealias AM, Saravanakumar MP. 2017. A review on the classification, characterisation,  
447 synthesis of nanoparticles and their application. *IOP Conference Series: Materials*  
448 *Science and Engineering*, 263(3). <https://doi.org/10.1088/1757-899X/263/3/032019>
- 449
- 450 9. Peters RJB, Bouwmeester H, Gottardo S, Amenta V, Arena M, Brandhoff P, Marvin HJP,  
451 Mech A, Moniz FB, Pseudo LQ, Rauscher H, Schoonjans R, Undas AK, Vettori MV,  
452 Weigel S, Aschberger K. 2016. Nanomaterials for products and application in agriculture,  
453 feed and food. *Trends in Food Science and Technology*, 54, 155–164.  
454 <https://doi.org/10.1016/j.tifs.2016.06.008>
- 455
- 456 10. Khot LR, Sankaran S, Maja JM, Ehsani R, Schuster EW. 2012. Applications of  
457 nanomaterials in agricultural production and crop protection: A review. *Crop Protection*,  
458 35, 64–70. <https://doi.org/10.1016/j.cropro.2012.01.007>
- 459
- 460 11. Rajput VD, Minkina T, Sushkova S, Tsitsuashvili V, Mandzhieva S, Gorovtsov A,  
461 Nevidomskaya D, Gromakova N. 2018. Effect of nanoparticles on crops and soil  
462 microbial communities. *Journal of Soils and Sediments*, 18(6), 2179–2187.  
463 <https://doi.org/10.1007/s11368-017-1793-2>
- 464
- 465 12. Mckee MS, Filser J. 2014. *From chip-in-a-lab to lab-on-a-chip: towards a single*  
466 *handheld electronic system for multiple application-specific lab-on-a-chip (ASLOC)*.  
467 <https://doi.org/10.1039/c6en00007j>
- 468
- 469 13. Holden PA, Schimel JP, Godwin HA. 2014. Five reasons to use bacteria when assessing  
470 manufactured nanomaterial environmental hazards and fates. *Current Opinion in*  
471 *Biotechnology*, 27, 73–78. <https://doi.org/10.1016/j.copbio.2013.11.008>
- 472

- 473 14. Chen J, He F, Zhang X, Sun X, Zheng J, Zheng J. 2014. Heavy metal pollution decreases  
474 microbial abundance, diversity and activity within particle-size fractions of a paddy soil.  
475 *FEMS Microbiology Ecology*, 87(1), 164–181. <https://doi.org/10.1111/1574-6941.12212>
- 476
- 477 15. Elmer W, White JC. 2018. The Future of Nanotechnology in Plant Pathology. *Annual*  
478 *Review of Phytopathology*, 56(1), 111–133. [https://doi.org/10.1146/annurev-phyto-](https://doi.org/10.1146/annurev-phyto-080417-050108)  
479 [080417-050108](https://doi.org/10.1146/annurev-phyto-080417-050108)
- 480
- 481 16. Dimkpa CO, Bindraban PS. 2018. Nanofertilizers: New Products for the Industry?  
482 [Review-article]. *Journal of Agricultural and Food Chemistry*, 66(26), 6462–6473.  
483 <https://doi.org/10.1021/acs.jafc.7b02150>
- 484
- 485 17. Kah M. 2015. Nanopesticides and Nanofertilizers: Emerging Contaminants or  
486 Opportunities for Risk Mitigation? *Frontiers in Chemistry*, 3(November), 1–6.  
487 <https://doi.org/10.3389/fchem.2015.00064>
- 488
- 489 18. Dimkpa CO, White JC, Elmer WH, Gardea-Torresdey J. 2017. Nanoparticle and ionic Zn  
490 promote nutrient loading of sorghum grain under low NPK fertilization. *Journal of*  
491 *Agricultural and Food Chemistry*, 65(39), 8552–8559.  
492 <https://doi.org/10.1021/acs.jafc.7b02961>
- 493
- 494 19. Gogos A, Knauer K, DBucheli T. 2012. Nanomaterials in Plant Protection and  
495 Fertilization: Current State, Foreseen Applications, and Research Priorities. *Journal of*  
496 *Agricultural and Food Chemistry*, 60(39), 9781–9792. <https://doi.org/10.1021/jf302154y>
- 497
- 498 20. Deng H, McShan D, Zhang Y, Sinha SS, Arslan Z, Ray PC, Yu H. 2016. Mechanistic  
499 Study of the Synergistic Antibacterial Activity of Combined Silver Nanoparticles and  
500 Common Antibiotics. *Environmental Science and Technology*, 50(16), 8840–8848.  
501 <https://doi.org/10.1021/acs.est.6b00998>
- 502
- 503 21. McShan D, Ray PC, Yu H. 2014. Molecular toxicity mechanism of nanosilver. *Journal of*  
504 *Food and Drug Analysis*, 22(1), 116–127. <https://doi.org/10.1016/j.jfda.2014.01.010>

505

506 22. Ge Y, Schimel JP, Holden PA. 2011. Evidence for Negative Effects of TiO<sub>2</sub> and ZnO  
507 Nanoparticles on Soil Bacterial Communities. *Environmental Science &*  
508 *Technology*, 45(4), 1659–1664. <https://doi.org/10.1021/es103040t>

509

510 23. McGee CF, Storey S, Clipson N, Doyle E. 2017. Soil microbial community responses to  
511 contamination with silver, aluminum oxide and silicon dioxide nanoparticles.  
512 *Ecotoxicology*, 26(3), 449–458. <https://doi.org/10.1007/s10646-017-1776-5>

513

514 24. He S, Feng Y, Ni J, Sun Y, Xue L, Feng Y, Yu Y, Lin X, Yang L. 2016. Different  
515 responses of soil microbial metabolic activity to silver and iron oxide nanoparticles.  
516 *Chemosphere*, 147, 195–202. <https://doi.org/10.1016/j.chemosphere.2015.12.055>

517

518 25. Frenk S, Ben-Moshe T, Dror I, Berkowitz B, Minz D. 2013. Effect of metal oxide  
519 nanoparticles on microbial community structure and function in two different soil types.  
520 *PLoS ONE*, 8(12), 1–12. <https://doi.org/10.1371/journal.pone.0084441>

521

522 26. Chen C, Tsyusko OV, McNear DH, Judy J, Lewis RW, Unrine JM. 2017. Effects of  
523 biosolids from a wastewater treatment plant receiving manufactured nanomaterials on  
524 *Medicago truncatula* and associated soil microbial communities at low nanomaterial  
525 concentrations. *Science of the Total Environment*, 609, 799–806.  
526 <https://doi.org/10.1016/j.scitotenv.2017.07.188>

527

528

529 27. McGee CF, Storey S, Clipson N, Doyle E. 2018. Concentration-dependent responses of  
530 soil bacterial, fungal and nitrifying communities to silver nano and micron particles.  
531 *Environmental Science and Pollution Research*, 25(19), 18693–18704.  
532 <https://doi.org/10.1007/s11356-018-2087-y>

533

534

535 28. Zhang H, Huang M, Zhang W, Gardea-Torresdey JL, White JC, Ji R, Zhao L. 2020.  
536 Silver Nanoparticles Alter Soil Microbial Community Compositions and Metabolite

- 537 Profiles in Unplanted and Cucumber-Planted Soils. *Environmental Science and*  
538 *Technology*, 54(6), 3334–3342. <https://doi.org/10.1021/acs.est.9b07562>
- 539
- 540 29. Colman BP, Arnaout CL, Anciaux S, Gunsch CK, Hochella MF. 2013. Low  
541 Concentrations of Silver Nanoparticles in Biosolids Cause Adverse Ecosystem Responses  
542 under Realistic Field Scenario. *PLoS ONE*, 8(2), 57189.  
543 <https://doi.org/10.1371/journal.pone.0057189>
- 544
- 545 30. Pfeiffer S, Pastar M, Mitter B, Lippert K, Hackl E, Lojan P, Oswald A, Sessitsch A.  
546 2014. Improved group-specific primers based on the full SILVA 16S rRNA gene  
547 reference database. *Environmental Microbiology*, 16(8), 2389–2407.  
548 <https://doi.org/10.1111/1462-2920.12350>
- 549
- 550 31. Babraham Bioinformatics - FastQC A Quality Control tool for High Throughput  
551 Sequence Data. <https://www.bioinformatics.babraham.ac.uk/projects/fastqc/>. Retrieved  
552 12 February 2022.
- 553
- 554 32. Ewels P, Magnusson M, Lundin S, Käller M. 2016. MultiQC: summarize analysis results  
555 for multiple tools and samples in a single report. *Bioinformatics* 32:3047–3048.
- 556
- 557 33. Schloss PD, Westcott SL, Ryabin T, Hall JR, Hartmann M, Hollister EB, Lesniewski RA,  
558 Oakley BB, Parks DH, Robinson CJ, Sahl JW, Stres B, Thallinger GG, Van Horn DJ,  
559 Weber CF. 2009. Introducing mothur: Open-source, platform-independent, community-  
560 supported software for describing and comparing microbial communities. *Applied and*  
561 *Environmental Microbiology*, 75(23), 7537–7541. [https://doi.org/10.1128/AEM.01541-](https://doi.org/10.1128/AEM.01541-09)  
562 09
- 563
- 564 34. Chao A. 1987. Estimating the Population Size for Capture-Recapture Data with Unequal  
565 Catchability. *Biometrics*, 43(4), 783. <https://doi.org/10.2307/2531532>
- 566
- 567 35. Simpson EH. 1949. Measurement of Diversity. *Nature*, 163(4148), 688.  
568 <https://doi.org/10.1038/163688a0>

- 569
- 570 36. Fung C, Rusling M, Lampeter T, Love C, Karim A, Bongiorno C, Yuan L-L. 2021.  
571 Automation of QIIME2 Metagenomic Analysis Platform. *Current Protocols* 1:e254.
- 572
- 573 37. Caporaso JG, Kuczynski J, Stombaugh J, Bittinger K, Bushman FD, Costello EK, Fierer  
574 N, Peña AG, Goodrich JK, Gordon JI, Huttley GA, Kelley ST, Knights D, Koenig JE,  
575 Ley RE, Lozupone CA, McDonald D, Muegge BD, Pirrung M, Reeder J, Sevinsky JR,  
576 Turnbaugh PJ, Walters WA, Widmann J, Yatsunenko T, Zaneveld J, Knight R. 2010.  
577 QIIME allows analysis of high-throughput community sequencing data. *Nat Methods*  
578 7:335–336.
- 579
- 580 38. McMurdie PJ, Holmes S. 2013. Phyloseq: An R Package for Reproducible Interactive  
581 Analysis and Graphics of Microbiome Census Data. *PLoS ONE*, 8(4).  
582 <https://doi.org/10.1371/journal.pone.0061217>
- 583
- 584
- 585 39. Böhme L, Langer U, Böhme F. 2005. Microbial biomass, enzyme activities and microbial  
586 community structure in two European long-term field experiments. *Agriculture,*  
587 *Ecosystems and Environment*, 109(1–2), 141–152.  
588 <https://doi.org/10.1016/j.agee.2005.01.017>
- 589
- 590 40. Deng H, McShan D, Zhang Y, Sinha SS, Arslan Z, Ray PC, Yu H. 2016. Mechanistic  
591 Study of the Synergistic Antibacterial Activity of Combined Silver Nanoparticles and  
592 Common Antibiotics. *Environmental Science and Technology*, 50(16),8840–8848.  
593 <https://doi.org/10.1021/acs.est.6b00998>
- 594
- 595 41. Zheng S, Hu J, Chen K, Yao J, Yu Z, Lin X. 2009. Soil microbial activity measured by  
596 microcalorimetry in response to long-term fertilization regimes and available  
597 phosphorous on heat evolution. *Soil Biology and Biochemistry*, 41(10), 2094–2099.  
598 <https://doi.org/10.1016/j.soilbio.2009.07.019>
- 599
- 600 42. Grün AL, Emmerling C. 2018. Long-term effects of environmentally relevant  
601 concentrations of silver nanoparticles on major soil bacterial phyla of a loamy soil.  
602 *Environmental Sciences Europe*, 30(1), 1–13. <https://doi.org/10.1186/s12302-018-0160-2>

- 603
- 604 43. Jurelevicius D, Pereira RdaS, daMota FF, Cury JC, deOliveira IC, Rosado AS, Mason  
605 OU, Jansson JK, Seldin L. 2021. Metagenomic analysis of microbial communities across  
606 a transect from low to highly hydrocarbon-contaminated soils in King George Island,  
607 Maritime Antarctica. *Geobiology*. <https://doi.org/10.1111/gbi.12472>
- 608
- 609 44. Asadishad B, Chahal S, Akbari A, Cianciarelli V, Azodi M, Ghoshal S, Tufenkji N. 2018.  
610 Amendment of agricultural soil with metal nanoparticles: Effects on soil enzyme activity  
611 and microbial community composition. *Environmental Science and Technology*, 55(6),  
612 4077–4078. <https://doi.org/10.1021/acs.est.1c01084>
- 613
- 614 45. Yang Y, Quensen J, Mathieu J, Wang Q, Wang J, Li M, Tiedje JM, Alvarez PJJ. 2014.  
615 Pyrosequencing reveals higher impact of silver nanoparticles than Ag<sup>+</sup> on the microbial  
616 community structure of activated sludge. *Water Research*, 48(1), 317–325.  
617 <https://doi.org/10.1016/j.watres.2013.09.046>
- 618
- 619 46. Grün AY, App CB, Breidenbach A, Meier J, Metreveli G, Schaumann GE, Manz W.  
620 2018. Effects of low dose silver nanoparticle treatment on the structure and community  
621 composition of bacterial freshwater biofilms. *PLoS ONE*, 13(6).  
622 <https://doi.org/10.1371/JOURNAL.PONE.0199132>
- 623
- 624 47. Ge Y, Schimel JP, Holdena PA. 2012. Identification of soil bacteria susceptible to TiO<sub>2</sub>  
625 and ZnO nanoparticles. *Applied and Environmental Microbiology*, 78(18), 6749–6758.  
626 <https://doi.org/10.1128/AEM.00941-12>
- 627
- 628 48. Wang J, Shu K, Zhang L, Si Y. 2017. Effects of Silver Nanoparticles on Soil Microbial  
629 Communities and Bacterial Nitrification in Suburban Vegetable Soils. *Pedosphere*, 27(3),  
630 482–490. [https://doi.org/10.1016/S1002-0160\(17\)60344-8](https://doi.org/10.1016/S1002-0160(17)60344-8)
- 631
- 632 49. Li X, Rui J, Xiong J, Li J, He Z. 2014. Functional Potential of Soil Microbial  
633 Communities in the Maize Rhizosphere. *PLoS ONE*, 9(11), 112609.  
634 <https://doi.org/10.1371/journal.pone.0112609.t001>



635

636 50. Lok CN, Ho CM, Chen R, He QY, Yu WY, Sun H, Tam PKH, Chiu JF, Che CM. 2006.  
637 *Proteomic Analysis of the Mode of Antibacterial Action of Silver Nanoparticles.*  
638 <https://doi.org/10.1021/pr0504079>

639

640 51. Meli K, Kamika I, Keshri J, Momba MNB. 2016. The impact of zinc oxide nanoparticles  
641 on the bacterial microbiome of activated sludge systems. *Scientific Reports*,  
642 6(November), 1–13. <https://doi.org/10.1038/srep39176>

643

644 52. Collins D, Luxton T, Kumar N, Shah S, Walker VK, Shah V. 2012. Assessing the impact  
645 of copper and zinc oxide nanoparticles on soil: A field study. *PLoS ONE*, 7(8), 1–11.  
646 <https://doi.org/10.1371/journal.pone.0042663>

647

648 53. Anandham R, Sa T. 2021. *Editorial for Special Issue “Environmental Factors Shaping*  
649 *the Soil Microbiome.”* <https://doi.org/10.3390/app112110387>

650

651 54. Xue PP, Carrillo Y, Pino V, Minasny B, Mcbratney AB. 2018. *Soil Properties Drive*  
652 *Microbial Community Structure in a Large Scale Transect in South Eastern Australia.* 8,  
653 11725. <https://doi.org/10.1038/s41598-018-30005-8>

654

655 55. He S, Feng Y, Ren H, Zhang Y, Gu N, Lin X. 2011. The impact of iron oxide magnetic  
656 nanoparticles on the soil bacterial community. *Journal of Soils and Sediments*, 11(8),  
657 1408–1417. <https://doi.org/10.1007/s11368-011-0415-7>

658

659 56. You T, Liu D, Chen J, Yang Z, Dou R, Gao X, Wang L. 2018. Effects of metal oxide  
660 nanoparticles on soil enzyme activities and bacterial communities in two different soil  
661 types. *Journal of Soils and Sediments*, 18(1), 211–221. [https://doi.org/10.1007/s11368-](https://doi.org/10.1007/s11368-017-1716-2)  
662 [017-1716-2](https://doi.org/10.1007/s11368-017-1716-2)

663
